# Supplementary material
Source: PubMed Central journal article supplement (PMC10103283)
Supplement: cjasn-18-446-s001.pdf [file cjasn-18-446-s001.pdf]

# Supplemental Material

## Table of contents

|                                                                                                                                                                                                                                                  |    |
|--------------------------------------------------------------------------------------------------------------------------------------------------------------------------------------------------------------------------------------------------|----|
| <b>Supplemental Item 1:</b> Categorization of Social Determinants of Health for sub-group analysis in MDRD and CRIC.....                                                                                                                         | 2  |
| 1. Income.....                                                                                                                                                                                                                                   | 2  |
| 2. Education level.....                                                                                                                                                                                                                          | 2  |
| 3. Employment Status .....                                                                                                                                                                                                                       | 3  |
| 4. Marital status.....                                                                                                                                                                                                                           | 3  |
| <b>Supplemental Table 1:</b> Measured GFR assessment in the MDRD Study and CRIC.....                                                                                                                                                             | 4  |
| <b>Supplemental Table 2.</b> Social Determinants of Health Categories by Race Groups .....                                                                                                                                                       | 5  |
| <b>Supplemental Table 3.</b> Effect of social determinants of health, estimated protein intake and creatinine excretion on the coefficient for Black race in GFR estimating equations.....                                                       | 7  |
| <b>Supplemental Table 4.</b> Effect of social determinants of health, estimated protein intake and creatinine excretion on age and sex coefficients in GFR estimating equations .....                                                            | 8  |
| <b>Supplemental Table 5.</b> Associations of demographic factors, social determinants of health, estimated protein intake and creatinine excretion on serum creatinine after adjustment for measured GFR and GFR measurement error.....          | 9  |
| <b>Supplemental Table 6.</b> Effect of social determinants of health, estimated protein intake and creatinine excretion on the association of Black race with serum creatinine after adjustment for measured GFR and GFR measurement error ..... | 10 |

**Supplemental Item 1:** Categorization of Social Determinants of Health for sub-group analysis in MDRD and CRIC

1. Income

a. **MDRD Study:** Total household gross yearly income was reported as a categorical variable. To better evaluate income for sub-group analysis, we took the midpoint of each income range, and divided by the number of people supported in part or in whole from the household income. For the \$ <7,500 and > 75,000 categories which have no midpoints, we used the median household yearly income in place of the mid-point of the interval. To define cut-off points for sub-group analysis, we took into account federal poverty levels at the time of the MDRD study.

| Original variable description for total household income   | Total household income as relation to federal poverty level in 1990 | Income per persons in household sub-groups for MDRD   |
|------------------------------------------------------------|---------------------------------------------------------------------|-------------------------------------------------------|
| \$ < 7,500                                                 | ~ 1 x federal poverty level                                         | Less than or equal to \$6,800 vs greater than \$6,800 |
| \$ 7,500 – 14,999                                          | ~ 1-2 x federal poverty level                                       |                                                       |
| \$ 15,000 – 24,999                                         | ~ 3 x federal poverty level                                         |                                                       |
| \$ 25,000 – 39,999                                         | ~ 4-6 x federal poverty level                                       |                                                       |
| \$ 40,000 – 49,999                                         | ~ 7 x federal poverty level                                         |                                                       |
| \$ 50,000 – 74,999                                         | ~ 8-11 x federal poverty level                                      |                                                       |
| \$ > = 75,000                                              | ~ 12 x federal poverty level                                        |                                                       |
| Federal poverty level around time of MDRD study = \$6,652. |                                                                     |                                                       |

b. **CRIC:** Total household gross yearly income was reported as a categorical variable. We did not estimate income per persons in household in CRIC, as number of persons supported in part or in whole from household income was not reported. Median splits was used to define cut-off points for sub-group analysis.

| Original variable description for total household income | Income sub-groups for CRIC                              |
|----------------------------------------------------------|---------------------------------------------------------|
| \$ < 20,000                                              | Less than \$50,000 vs greater than or equal to \$50,000 |
| \$ 20,000 – 50,000                                       |                                                         |
| \$ 50,000 – 100,000                                      |                                                         |
| \$ > 100,000                                             |                                                         |

2. Education level

| Original variable description      | MDRD and CRIC            |
|------------------------------------|--------------------------|
| College graduate with professional | College graduate or more |
| College graduate                   |                          |

|                                                                                                                                        |                                 |
|----------------------------------------------------------------------------------------------------------------------------------------|---------------------------------|
| At least one year of college                                                                                                           | Some college education          |
| High school graduate                                                                                                                   | High school graduate            |
| Completed 10-11 years of school                                                                                                        | Less than high school education |
| Completed 7-9 years of school                                                                                                          |                                 |
| Completed <7 years of school                                                                                                           |                                 |
| Variables were matched to subgroups based on description of education level. Variables in the same subgroup are given the same colour. |                                 |

### 3. Employment Status

| Original variable description                                                                                                            | MDRD         | CRIC         |
|------------------------------------------------------------------------------------------------------------------------------------------|--------------|--------------|
| Full time                                                                                                                                | Employed     | Employed     |
| Part time                                                                                                                                | Employed     | Employed     |
| Unemployed not due to disability                                                                                                         | Unemployed   | Unemployed   |
| Unemployed due to disability                                                                                                             | Disability   | Not captured |
| Retired due to disability                                                                                                                | Disability   | Not captured |
| Laid Off                                                                                                                                 | Not captured | Disability   |
| Medical Leave                                                                                                                            | Not captured | Disability   |
| Retired not due to disability                                                                                                            | Employed     | Employed     |
| Other                                                                                                                                    | Employed     | Employed     |
| Student                                                                                                                                  | Employed     | Employed     |
| Homemaker                                                                                                                                | Employed     | Employed     |
| Variables were matched to subgroups based on description of employment status. Variables in the same subgroup are given the same colour. |              |              |

### 4. Marital status

| Original variable description                                                                                                         | MDRD         | CRIC        |
|---------------------------------------------------------------------------------------------------------------------------------------|--------------|-------------|
| Single                                                                                                                                | Not-married  | Not-married |
| Married                                                                                                                               | Married      | Married     |
| Domestic Partner                                                                                                                      | Not captured | Married     |
| Separated                                                                                                                             | Not-married  | Not-married |
| Divorced                                                                                                                              | Not-married  | Not-married |
| Widowed                                                                                                                               | Not-married  | Not-married |
| Variables were matched to subgroups based on description of marital status. Variables in the same subgroup are given the same colour. |              |             |

**Supplemental Table 1:** measured GFR assessment in the MDRD Study and CRIC

| <b>Study</b> | <b>Measured GFR assessment</b>                                                                                                                                                                                                                                                                                           |
|--------------|--------------------------------------------------------------------------------------------------------------------------------------------------------------------------------------------------------------------------------------------------------------------------------------------------------------------------|
| MDRD         | GFR was measured by the urinary clearance of $^{125}\text{I}$ – iothalamate based on a time-weighted mean of four serum activity measurements and a volume-weighted mean of four urine activity measurements. GFR measurements were indexed to body surface area ( $\text{mL}/\text{min}/1.73\text{m}^2$ ). <sup>1</sup> |
| CRIC         | GFR was measured using urinary clearance of $^{125}\text{I}$ – iothalamate based on a time-weighted average across up to four collection periods (after dropping the first period) and indexed to body surface area ( $\text{mL}/\text{min}/1.73\text{ m}^2$ ). <sup>2</sup>                                             |

**Supplemental Table 2.** Social Determinants of Health Categories by Race Groups

a. MDRD Study

| <i>Social determinants of health</i>                   | <b>Black</b><br>(N=197) | <b>non-Black</b><br>(N=1,431) | <b>P-value</b> |
|--------------------------------------------------------|-------------------------|-------------------------------|----------------|
| <b>Total Gross Annual household Income – no. (%)</b>   |                         |                               |                |
| Less than \$7,500                                      | 21 (11%)                | 47 (3%)                       | <0.001         |
| \$7,500 - \$14,999                                     | 28 (14%)                | 107 (7%)                      |                |
| \$15,000 - \$24,999                                    | 39 (20%)                | 205 (14%)                     |                |
| \$25,000 - \$39,999                                    | 40 (20%)                | 311 (22%)                     |                |
| \$40,000 - \$49,999                                    | 15 (8%)                 | 199 (14%)                     |                |
| \$50,000 - \$74,999                                    | 24 (12%)                | 277 (19%)                     |                |
| Greater than or equal to \$75,000                      | 12 (6%)                 | 202 (14%)                     |                |
| NA                                                     | 18 (9%)                 | 83 (6%)                       |                |
| <b>Number of people supported from income</b>          | 2.7 ± 1.7               | 2.5 ± 1.2                     | 0.047          |
| <b>Household income per person supported – no. (%)</b> |                         |                               |                |
| ≤6800                                                  | 45 (23%)                | 144 (10%)                     | <0.001         |
| >6800                                                  | 134 (68%)               | 1,198 (84%)                   |                |
| NA                                                     | 18 (9%)                 | 89 (6%)                       |                |
| <b>Education category – no. (%)</b>                    |                         |                               |                |
| College graduate with professional degree              | 34 (17%)                | 296 (21%)                     | <0.001         |
| College graduate                                       | 25 (13%)                | 247 (17%)                     |                |
| At least one year of college                           | 51 (26%)                | 379 (26%)                     |                |
| High school graduate                                   | 51 (26%)                | 379 (26%)                     |                |
| Completed 10 <sup>th</sup> -11 <sup>th</sup> grade     | 23 (12%)                | 72 (5%)                       |                |
| Completed 7 <sup>th</sup> -9 <sup>th</sup> grade       | 8 (4%)                  | 41 (3%)                       |                |
| Completed less than 7 <sup>th</sup> grade              | 4 (2%)                  | 16 (1%)                       |                |
| NA                                                     | 1 (1%)                  | 1 (0%)                        |                |
| <b>Employment status – no. (%)</b>                     |                         |                               |                |
| Homemaker                                              | 2 (1%)                  | 13 (1%)                       | <0.001         |
| Full time                                              | 106 (54%)               | 806 (56%)                     |                |
| Part time                                              | 13 (7%)                 | 153 (11%)                     |                |
| Unemployed not due to disability                       | 25 (13%)                | 118 (8%)                      |                |
| Unemployed due to disability                           | 20 (10%)                | 48 (3%)                       |                |
| Retired not due to disability                          | 22 (11%)                | 198 (14%)                     |                |
| Retired due to disability                              | 9 (5%)                  | 87 (6%)                       |                |
| Other                                                  | 0 (0%)                  | 3 (0%)                        |                |
| Student                                                | 0 (0%)                  | 4 (0%)                        |                |
| NA                                                     | 0 (0%)                  | 1 (0%)                        |                |
| <b>Marital status – no. (%)</b>                        |                         |                               |                |
| Unmarried                                              | 94 (48%)                | 372 (26%)                     | <0.001         |
| NA                                                     | 103 (52%)               | 1,059 (74%)                   |                |

b. CRIC

| <i>Social determinants of health</i>                 | <b>Black</b><br>(N=528) | <b>non-Black</b><br>(N=895) | <b>P-value</b> |
|------------------------------------------------------|-------------------------|-----------------------------|----------------|
| <b>Total Gross Annual household income – no. (%)</b> |                         |                             |                |
| \$20,000 or under                                    | 185 (35%)               | 202 (23%)                   | <0.001         |
| \$20,001 - \$50,000                                  | 143 (27%)               | 223 (25%)                   |                |
| \$50,001 - \$100,000                                 | 92 (17%)                | 218 (24%)                   |                |
| More than \$100,000                                  | 26 (5%)                 | 129 (14%)                   |                |
| Don't wish to answer                                 | 82 (16%)                | 123 (14%)                   |                |
| <b>Education Category – no. (%)</b>                  |                         |                             |                |
| Less than high school education                      | 104 (20%)               | 398 (44%)                   | <0.001         |
| High school graduate                                 | 178 (34%)               | 223 (25%)                   |                |
| Some college education                               | 122 (23%)               | 140 (16%)                   |                |
| College graduate or more                             | 124 (23%)               | 133 (15%)                   |                |
| NA                                                   | 0 (0%)                  | 1 (0%)                      |                |
| <b>Employment Status – no. (%)</b>                   |                         |                             |                |
| Full-time                                            | 139 (26%)               | 368 (41%)                   | <0.001         |
| Part Time                                            | 48 (9%)                 | 99 (11%)                    |                |
| Unemployed                                           | 60 (11%)                | 54 (6%)                     |                |
| Not working due to disability                        | 100 (19%)               | 78 (9%)                     |                |
| Retired                                              | 166 (31%)               | 252 (28%)                   |                |
| Other (including student and homemaker)              | 15 (3%)                 | 44 (5%)                     |                |
| <b>Marital status – no. (%)</b>                      |                         |                             |                |
| Not-married                                          | 296 (56%)               | 288 (32%)                   | <0.001         |
| Married                                              | 232 (44%)               | 607 (68%)                   |                |

**Supplemental Table 3.** Effect of social determinants of health, estimated protein intake and creatinine excretion on the coefficient for Black race in GFR estimating equations

| Models                            | MDRD                            |                                      | CRIC                            |                                      |
|-----------------------------------|---------------------------------|--------------------------------------|---------------------------------|--------------------------------------|
|                                   | Coefficient for Black race (SE) | 95% CI of coefficient for Black race | Coefficient for Black race (SE) | 95% CI of coefficient for Black race |
| Base                              | 0.190 (0.015)                   | (0.162, 0.219)                       | 0.118 (0.013)                   | (0.093, 0.144)                       |
| + <i>HH income</i>                | 0.201 (0.015)                   | (0.171, 0.231)                       | 0.130 (0.013)                   | (0.105, 0.156)                       |
| + <i>Number supported per HH</i>  | 0.191 (0.015)                   | (0.162, 0.219)                       | NA                              | NA                                   |
| + <i>Education level</i>          | 0.195 (0.015)                   | (0.166, 0.224)                       | 0.126 (0.013)                   | (0.100, 0.153)                       |
| + <i>Employment status</i>        | 0.193 (0.015)                   | (0.164, 0.222)                       | 0.130 (0.013)                   | (0.104, 0.156)                       |
| + <i>Marital status</i>           | 0.188 (0.015)                   | (0.159, 0.217)                       | 0.124 (0.013)                   | (0.098, 0.150)                       |
| + <i>Joint SDH</i>                | 0.200 (0.016)                   | (0.169, 0.230)                       | 0.136 (0.014)                   | (0.109, 0.163)                       |
| + <i>EPI from UUN</i>             | 0.204 (0.014)                   | (0.176, 0.232)                       | 0.140 (0.014)                   | (0.113, 0.167)                       |
| + <i>Joint SDH + EPI from UUN</i> | 0.213 (0.015)                   | (0.183, 0.242)                       | 0.152 (0.014)                   | (0.124, 0.180)                       |
| + <i>UcrV</i>                     | 0.156 (0.014)                   | (0.128, 0.183)                       | 0.104 (0.013)                   | (0.078, 0.130)                       |
| + <i>Joint SDH + UcrV</i>         | 0.161 (0.015)                   | (0.132, 0.189)                       | 0.118 (0.014)                   | (0.091, 0.146)                       |

Estimates are expressed in natural log form. Base model shows Black race coefficient estimates for regression of log mGFR on age, sex, race and log Scr. Each subsequent row shows estimates when SDH factors, EPI from UUN and urine creatinine excretion are added to the base model alone or together with other covariates. EPI from UUN and urine creatinine excretion were expressed as natural logs in these models. Abbreviations: HH, household; EPI from UUN, estimated protein intake from urine urea nitrogen; UcrV, urine creatinine excretion; Scr, serum creatinine; SDH, social determinants of health; Joint SDH, all social determinants of health.

**Supplemental Table 4.** Effect of social determinants of health, estimated protein intake and creatinine excretion on age and sex coefficients in GFR estimating equations

| Models                            | MDRD           |                  |                |                  | CRIC           |                  |                |                  |
|-----------------------------------|----------------|------------------|----------------|------------------|----------------|------------------|----------------|------------------|
|                                   | Age            |                  | Sex            |                  | Age            |                  | Sex            |                  |
|                                   | $\beta$ (SE)   | 95% CI           |
| Base                              | -0.005 (0.000) | (-0.005, -0.004) | -0.300 (0.010) | (-0.320, -0.280) | -0.006 (0.001) | (-0.007, -0.005) | -0.308 (0.014) | (-0.335, -0.282) |
| + <i>HH income</i>                | -0.005 (0.000) | (-0.006, -0.004) | -0.298 (0.010) | (-0.318, -0.278) | -0.006 (0.001) | (-0.007, -0.005) | -0.294 (0.014) | (-0.321, -0.268) |
| + <i>Number supported per HH</i>  | -0.005 (0.000) | (-0.005, -0.004) | -0.300 (0.010) | (-0.320, -0.280) | NA             | NA               | NA             | NA               |
| + <i>Education level</i>          | -0.005 (0.000) | (-0.005, -0.004) | -0.294 (0.010) | (-0.314, -0.274) | -0.006 (0.001) | (-0.007, -0.005) | -0.304 (0.014) | (-0.331, -0.278) |
| + <i>Employment status</i>        | -0.004 (0.000) | (-0.005, -0.003) | -0.294 (0.011) | (-0.315, -0.273) | -0.006 (0.001) | (-0.007, -0.004) | -0.292 (0.014) | (-0.319, -0.265) |
| + <i>Marital status</i>           | -0.005 (0.000) | (-0.005, -0.004) | -0.301 (0.010) | (-0.321, -0.281) | -0.006 (0.001) | (-0.007, -0.005) | -0.304 (0.014) | (-0.331, -0.277) |
| + <i>Joint SDH</i>                | -0.004 (0.000) | (-0.005, -0.003) | -0.293 (0.011) | (-0.315, -0.272) | -0.006 (0.001) | (-0.007, -0.004) | -0.285 (0.014) | (-0.312, -0.257) |
| + <i>EPI from UUN</i>             | -0.005 (0.000) | (-0.005, -0.004) | -0.289 (0.010) | (-0.308, -0.270) | -0.006 (0.001) | (-0.007, -0.005) | -0.295 (0.014) | (-0.323, -0.268) |
| + <i>Joint SDH + EPI from UUN</i> | -0.004 (0.000) | (-0.005, -0.003) | -0.282 (0.011) | (-0.303, -0.261) | -0.006 (0.001) | (-0.007, -0.004) | -0.276 (0.014) | (-0.304, -0.248) |
| + <i>UcrV</i>                     | -0.003 (0.000) | (-0.004, -0.003) | -0.172 (0.013) | (-0.197, -0.147) | -0.005 (0.001) | (-0.006, -0.004) | -0.254 (0.015) | (-0.283, -0.225) |
| + <i>Joint SDH + UcrV</i>         | -0.003 (0.000) | (-0.004, -0.002) | -0.160 (0.013) | (-0.186, -0.134) | -0.005 (0.001) | (-0.006, -0.004) | -0.241 (0.015) | (-0.270, -0.211) |

Base model shows age and sex coefficient estimates for regression of log mGFR on age, sex, race and log Scr. Each subsequent row shows estimates when SDH factors, EPI from UUN and urine creatinine excretion are added to the base model alone or together with other covariates. EPI from UUN and urine creatinine excretion were expressed as natural logs in these models. Abbreviations: HH, household; EPI from UUN, estimated protein intake from urine urea nitrogen; UcrV, urine creatinine excretion; Scr, serum creatinine; SDH, social determinants of health; Joint SDH, all social determinant of health factors. Estimates are expressed in natural log form.



**Supplemental Table 5.** Associations of demographic factors, social determinants of health, estimated protein intake and creatinine excretion on serum creatinine after adjustment for measured GFR and GFR measurement error

| Models                     | MDRD |                        |                                        |                     | CRIC |                        |                                        |                     |
|----------------------------|------|------------------------|----------------------------------------|---------------------|------|------------------------|----------------------------------------|---------------------|
|                            | N    | $\beta$ (95% CI)       | $\beta$ Percentage difference (95% CI) | Partial correlation | N    | $\beta$ (95% CI)       | $\beta$ Percentage difference (95% CI) | Partial correlation |
| Age                        | 1628 | -0.07 (-0.08 , - 0.05) | -6.59 (-8.10 , - 5.05)                 | -0.19               | 1423 | -0.07 (-0.09 , - 0.06) | -7.01 (-8.39 , - 5.60)                 | -0.23               |
| Female sex                 | 1628 | -0.24 (-0.26 , - 0.23) | -21.72 (-23.09 , - 20.33)              | -0.57               | 1423 | -0.24 (-0.26 , - 0.22) | -21.19 (-22.61 , - 19.74)              | -0.57               |
| Black race                 | 1628 | 0.15 (0.12 , 0.18)     | 16.74 (13.31 , 20.26)                  | 0.24                | 1423 | 0.09 (0.07 , 0.11)     | 9.24 (6.85 , 11.68)                    | 0.21                |
| Household income           | 1521 | 0.02 (-0.02 , 0.05)    | 1.53 (-1.83 , 5.01)                    | 0.02                | 1423 | 0.02 (0.00 , 0.04)     | 2.02 (-0.28 , 4.38)                    | 0.03                |
| Number of people supported | 1622 | 0.02 (0.01 , 0.03)     | 1.87 (1.11 , 2.64)                     | 0.11                | NA   | NA                     | NA                                     | NA                  |
| Education                  |      |                        |                                        | -0.16               |      |                        |                                        | 0.04                |
| College graduate or more   | 1626 | Ref                    | Ref                                    |                     | 1422 | Ref                    | Ref                                    |                     |
| Some college education     | 1626 | -0.04 (-0.07 , - 0.02) | -4.27 (-6.74 , - 1.75)                 |                     | 1422 | 0.03 (0.00 , 0.05)     | 2.54 (-0.21 , 5.36)                    |                     |
| High school graduate       | 1626 | -0.07 (-0.10 , - 0.05) | -6.82 (-9.11 , - 4.46)                 |                     | 1422 | 0.01 (-0.02 , 0.04)    | 0.96 (-2.25 , 4.29)                    |                     |
| Less than high school      | 1626 | -0.10 (-0.14 , - 0.07) | -9.79 (-12.96 , - 6.50)                |                     | 1422 | 0.01 (-0.02 , 0.04)    | 1.00 (-2.32 , 4.44)                    |                     |
| Current employment         |      |                        |                                        | -0.16               |      |                        |                                        | -0.01               |
| Employed                   | 1531 | Ref                    | Ref                                    |                     | 1423 | Ref                    | Ref                                    |                     |
| Unemployed                 | 1531 | -0.14 (-0.18 , - 0.10) | -13.21 (-16.42 , - 9.86)               |                     | 1423 | 0.03 (-0.02 , 0.07)    | 2.93 (-1.49 , 7.55)                    |                     |
| Disability                 | 1531 | -0.07 (-0.09 , - 0.04) | -6.50 (-8.98 , - 3.96)                 |                     | 1423 | -0.02 (-0.06 , 0.01)   | -2.24 (-5.43 , 1.07)                   |                     |
| Married                    | 1628 | 0.00 (-0.03 , 0.02)    | -0.23 (-2.49 , 2.07)                   | -0.001              | 1423 | 0.02 (0.00 , 0.04)     | 2.22 (0.00 , 4.50)                     | 0.05                |
| EPI from UUN               | 1628 | 0.03 (0.02 , 0.04)     | 3.57 (2.19 , 4.97)                     | 0.09                | 1350 | 0.02 (0.01 , 0.03)     | 2.08 (0.85 , 3.33)                     | 0.07                |
| Urine creatinine excretion | 1628 | 0.18 (0.16 , 0.19)     | 19.13 (17.58 , 20.70)                  | 0.56                | 1357 | 0.09 (0.07 , 0.11)     | 9.78 (7.61 , 12.00)                    | 0.38                |

Each row in the table shows estimates of the regression of log Scr on a separate independent predictor variable, after adjusting for measured GFR and GFR measurement error. Independent variables used in each model are shown on the first column. Table also shows the partial correlation of each independent variable and log Scr, after adjusting for measured GFR. Continuous variables are expressed per interquartile range. Abbreviations: Scr, serum creatinine; GFR, glomerular filtration rate; EPI from UUN, estimated protein intake from urine urea nitrogen; SDH, social determinants of health. Estimates are expressed in natural log form.

**Supplemental Table 6.** Effect of social determinants of health, estimated protein intake and creatinine excretion on the association of Black race with serum creatinine after adjustment for measured GFR and GFR measurement error

| Models                                   | MDRD |                    |                                        |                     | CRIC |                    |                                        |                     |
|------------------------------------------|------|--------------------|----------------------------------------|---------------------|------|--------------------|----------------------------------------|---------------------|
|                                          | N    | $\beta$ (95% CI)   | $\beta$ Percentage difference (95% CI) | Partial correlation | N    | $\beta$ (95% CI)   | $\beta$ Percentage difference (95% CI) | Partial correlation |
| Base                                     | 1628 | 0.16 (0.13 , 0.18) | 17.10 (14.39 , 19.88)                  | 0.305               | 1423 | 0.10 (0.08 , 0.12) | 10.52 (8.62 , 12.44)                   | 0.298               |
| + <i>HH income</i>                       | 1521 | 0.16 (0.14 , 0.19) | 17.82 (14.98 , 20.73)                  | 0.315               | 1423 | 0.10 (0.08 , 0.12) | 10.74 (8.83 , 12.69)                   | 0.298               |
| + <i>Number supported per HH</i>         | 1622 | 0.16 (0.13 , 0.18) | 17.14 (14.43 , 19.91)                  | 0.306               | NA   | NA                 | NA                                     | NA                  |
| + <i>education</i>                       | 1626 | 0.16 (0.14 , 0.19) | 17.53 (14.74 , 20.39)                  | 0.309               | 1422 | 0.10 (0.08 , 0.12) | 10.54 (8.56 , 12.56)                   | 0.285               |
| + <i>employment</i>                      | 1531 | 0.16 (0.13 , 0.18) | 17.05 (14.25 , 19.93)                  | 0.306               | 1423 | 0.11 (0.09 , 0.12) | 11.08 (9.14 , 13.06)                   | 0.306               |
| + <i>marital status</i>                  | 1628 | 0.16 (0.13 , 0.18) | 16.95 (14.19 , 19.78)                  | 0.300               | 1423 | 0.10 (0.08 , 0.12) | 10.82 (8.86 , 12.80)                   | 0.296               |
| + <i>joint SDH</i>                       | 1434 | 0.16 (0.14 , 0.19) | 17.62 (14.61 , 20.70)                  | 0.309               | 1422 | 0.11 (0.09 , 0.13) | 11.22 (9.15 , 13.34)                   | 0.292               |
| + <i>EPI from UUN</i>                    | 1628 | 0.17 (0.14 , 0.19) | 18.34 (15.55 , 21.20)                  | 0.319               | 1350 | 0.11 (0.09 , 0.13) | 11.65 (9.66 , 13.67)                   | 0.314               |
| + <i>UcrV</i>                            | 1628 | 0.14 (0.11 , 0.16) | 14.57 (11.94 , 17.25)                  | 0.277               | 1357 | 0.09 (0.08 , 0.11) | 9.81 (7.90 , 11.76)                    | 0.296               |
| + <i>Joint SDH + UcrV</i>                | 1434 | 0.13 (0.11 , 0.16) | 14.33 (11.51 , 17.21)                  | 0.273               | 1356 | 0.10 (0.08 , 0.12) | 10.32 (8.21 , 12.46)                   | 0.274               |
| + <i>Joint SDH + UcrV + EPI from UUN</i> | 1087 | 0.13 (0.11 , 0.16) | 14.13 (11.12 , 17.21)                  | 0.259               | 1349 | 0.10 (0.08 , 0.12) | 10.54 (8.43 , 12.69)                   | 0.272               |

Base model shows Black race coefficient estimates for regression of log Scr on age, sex, race, mGFR and error. Each subsequent row shows estimates when SDH and EPI from UUN and urine creatinine excretion are added to the base model alone or together with other covariates. Table also shows the partial correlation of each model's independent variables and log Scr, after adjusting for measured GFR. EPI from UUN and urine creatinine excretion were expressed as natural logs in these models. Estimates are expressed in natural log form. Abbreviations: HH, household; EPI from UUN, estimated protein intake from urine urea nitrogen; Scr, serum creatinine; mGFR, measured glomerular filtration rate; UcrV, urine creatinine excretion; SDH, social determinants of health; Joint SDH, all social determinants of health.

## References

1. Beck G, Berg R, Coggins C, et al. Design and statistical issues of the Modification of Diet in Renal Disease Trial. The Modification of Diet in Renal Disease Study Group. *Control Clin Trials*. 1991;12(5):566-586.
2. Anderson AH, Yang W, Hsu CY, et al. Estimating GFR among participants in the Chronic Renal Insufficiency Cohort (CRIC) Study. *Am J Kidney Dis*. 2012;60(2):250-261.
